## RESEARCH ARTICLE

# *SERT* gene polymorphisms are associated with risk-taking behaviour and breeding parameters in wild great tits

Killu Timm\*, Kees Van Oers and Vallo Tilgar

**ABSTRACT**

Individual differences in coping with potentially dangerous situations are affected by a combination of genetic and environmental factors. How genetic polymorphisms and behavioural variations are related to fitness is unknown. One of the candidate genes affecting a variety of behavioural processes, including impulsivity, anxiety and mood fluctuations in both humans and other vertebrates, is the serotonin transporter gene (*SERT/SLC6A*). The aim of this study was to assess an association between *SERT* genotypes and novelty-seeking and risk-taking behaviours as well as breeding parameters of great tits (*Parus major*) in a natural environment. We associated polymorphisms in the promoter exonic regions of the *SERT* gene with parental risk-taking-related behaviour and fitness traits. Our results show that: (1) risk-taking behaviour in our great tit population is linked to single nucleotide polymorphisms in the *SERT* gene exon 3 and exon 8; (2) the genotype–behaviour associations are consistent with the presence of different stressors; and (3) polymorphisms in exon 8 could be associated with fitness-related traits, such as the start of egg-laying and hatching success. We showed for the first time that genetic variability of *SERT* plays an important role in shaping individual decision-making that affects fitness in a wild population. However, the results are based on one population and on the polymorphisms that are in a single gene. Therefore, replication studies are needed in order to confirm these preliminary results.

**KEY WORDS:** Personality, Candidate gene, Serotonin, Fitness, Reproduction

**INTRODUCTION**

A combination of genes, the environment and experience-based learning is known to be responsible for variation in animal (including human) behaviour (Carere and Maestripieri, 2013). However, the molecular mechanisms underlying behavioural differences between individuals in natural animal populations, and to what extent variation in these mechanisms cause fitness differences, are not well understood. Although the gene–behaviour associations are environment and condition dependent (Adriaenssens and Johnsson, 2010), behavioural traits consistently differ between individuals of the same population (for a review, see Carere and Maestripieri, 2013) and have a significant genetic basis (for a review, see Laine and van Oers, 2017). Hence, it is important to conduct experiments in different situations and habitats, and across different years to evaluate the repeatability of behaviours and

assess the generality of previously reported genetic effects on behavioural variation. Moreover, in order to understand evolutionary change in phenotypes, a connection between genes, behaviour and individual fitness should be tested in the same study system (see review by van Oers et al., 2005). Growing evidence has suggested that variation in many behavioural traits such as fear, anxiety and novelty-seeking are associated with dopamine- and serotonin-related signalling affected by genes (Korsten et al., 2010; van Oers et al., 2005; Serretti et al., 2006).

The role of serotonin transmission in shaping fear-related behavioural variation is widely studied in humans and laboratory animals (Canli and Lesch, 2007; Gryglewski et al., 2014) and also in free-living populations (Champoux et al., 2002; Serretti et al., 2006). Alterations in the expression of neurotransmitter-related genes could change serotonergic signalling and thus ultimately shape behaviours in which serotonin has been implicated (O’Leary and Cryan, 2010). A candidate gene that is central to the regulation of extracellular and synaptic serotonin concentration is the serotonin transporter gene (*SERT*). Variation in *SERT* gene expression has been associated with differences in the *SERT* protein availability and in modulating active reuptake of serotonin between synapses (Lesch et al., 1996). *SERT* gene polymorphisms in humans have been repeatedly linked with different psychiatric states such as depression, anxiety and suicidal behaviour (Murphy et al., 2008). In addition, serotonin transport affects parental behaviour through behavioural decisions and by prolactin secretion controlled by neural pathways containing serotonin (e.g. Bakermans-Kranenburg and van Ijzendoorn, 2008). However, the relationships found between behavioural traits and genetic differences in serotonin-related genes in humans have not always been consistent (Savitz and Ramesar, 2004).

In this study we used the candidate gene approach to explore the association of *SERT* gene polymorphisms with behaviour in a natural population of breeding great tits (*Parus major* Linnaeus 1758). For birds, *SERT* gene variation was found to be different in urban compared with rural populations of blackbirds (*Turdus merula*) (Müller et al., 2013). Also, Riyahi et al. (2015) have provided evidence that these polymorphisms in great tits differ between environments. Finally, the *SERT* gene in dunnocks (*Prunella modularis*) has been shown to affect female behaviour, where homozygous females took fewer risks than heterozygotes (Holtmann et al., 2016). We hypothesize that the *SERT* gene plays an important role in affecting great tit individual novelty-seeking and fear-related behaviours. Moreover, because individual differences in behavioural decisions could affect fitness, we explored the link between genetic polymorphisms and breeding parameters. For this, we determined the polymorphic regions of the *SERT* gene (exons) and the promoter region. From these, we identified nine single nucleotide polymorphisms (SNPs) for testing the relationships between behavioural phenotypes and genotypes. We used samples originating from two different years in order to examine the generality of the effect. Specifically, we first predicted

University of Tartu, Vanemuise 46, Tartu 51101, Estonia.

\*Author for correspondence (killu@ut.ee)

 K.T., 0000-0001-6556-3128

Received 5 October 2017; Accepted 3 January 2018

that the parental latency to feed nestlings at the presence of different novel objects varies between genotypes. Previous studies have shown that the delay in nest visitation and nestling provisioning rates are repeatable characteristics in great tits (Pagani-Núñez and Senar, 2013; Vrublevska et al., 2015). Hence, this trait can be regarded as a potential candidate trait for assessing personality in the wild. Second, we predicted that variation in breeding parameters such as the first egg date, clutch and brood size are associated with these genetic variants, probably via consistent behavioural differences between individuals. This assumption is based on previous studies reporting that reproductive success covaries with serotonergic signalling and maternal care in mice (Lerch-Haner et al., 2008) and in relation to personality variation (Smith and Blumstein, 2008).

## MATERIALS AND METHODS

The study was conducted in southwest Estonia (58°7'N, 25°5'E) at the Kilingi-Nõmme study site during springs 2012 and 2014 in the great tit breeding season (April to June). The area (approximately 50 km<sup>2</sup>) consists of deciduous (*Betula pendula*, *Alnus* spp. and *Salix* spp.) and coniferous (*Pinus sylvestris* and *Picea abies*) forest patches. Great tits in our study population breed in nest boxes mounted on tree trunks at a height of 1.5–1.8 m.

The nest boxes were checked throughout the breeding period to obtain data on lay date of the first egg, clutch size, hatching date (hatch date=day 0 post-hatch) and number of hatchlings and nestlings (15 days old). Adults (both male and female) were caught using nest-box traps during the second half of the nestling period (between days 7 and 15 post-hatch). Traps were checked every 15 min. Adults were ringed and weighed with a Pesola spring balance (precision 0.1 g). Captured adults were 1–2 years of age. Tarsus and wing length were measured using sliding calipers (with precision to 0.1 mm). Blood samples (~70 µl) were taken from the brachial vein with a sterile lancet and collected in a heparinized capillary tube. The blood was immediately stored at +4°C, and afterwards centrifuged to separate cells from plasma and then stored at –80°C until DNA analysis. Birds were ringed under Estonian Department of Environment Licence No. 11 and blood samples were taken under Animal Procedures Committee of the Estonian Ministry of Agriculture Licence No. 100.

## Genotyping

DNA was extracted from the blood samples (2012) with a commercial kit (High Pure PCR Template Preparation Kit 18, Roche, Basel, Switzerland) according to the manufacturer's instructions. Blood samples collected in 2014 were treated with the Puregene DNA Purification Kit (Qiagen, Hilden, Germany). The concentration of received DNA was approximately 1 µg 1 ml<sup>-1</sup>. Primers were designed using the great tit genome (assembly Parus\_major1.1.; accession number: SRS1185780; Laine et al., 2016). Primer sequences for *SERT* gene exonic regions (exons 1–13) were designed *de novo* (see Table 1).

Primers for promoter region were used from Riyahi et al. (2015). The PCR reaction mixture (25 µl) consisted of 2 µl (consisting of 2 ng genomic DNA), 5 µl recombinant Taq Fire polymerase, 0.5 µl of each primer and water (17 µl). Amplification was performed sequentially as follows: 95°C for 3 min, 38 cycles at 95°C for 30 s, 52°C for 30 s, 72°C for 1 min and finally 72°C for 4 min. All the samples were sequenced at the Estonian Biocentre (Tartu, Estonia), where an Applied Biosystems sequencing platform was used. Received sequences were aligned using ChromasPro (Technelysium Pty Ltd, South Brisbane, Australia) and visually examined for

**Table 1. Primer sequences for the *SERT* gene and sequence lengths**

| Primer name                       |         | 5'–3'                     | Base pairs |
|-----------------------------------|---------|---------------------------|------------|
| Exon 1                            | Forward | CTCCTCGATAATTTGTTATACACGA | 456        |
|                                   | Reverse | ATCTGATGGATTTAAGCATGGAAG  |            |
| Exon 2                            | Forward | GGTGATCTGGAGTTTTAGGAAAG   | 134        |
|                                   | Reverse | ATGAGAAATCCCACAGTAATTCAG  |            |
| Exon 3                            | Forward | CAAGATTTGAAGTGATTTGAAGTGA | 219        |
|                                   | Reverse | TATCTCTGAAGTCACAAGAAATGC  |            |
| Exon 4                            | Forward | CTTTATTGCTTGGATAGGAGTAGC  | 138        |
|                                   | Reverse | GAAATGTCGTGATTTTGAAGCTG   |            |
| Exon 5                            | Forward | AAGCTAAATTGAGGGTGGACT     | 134        |
|                                   | Reverse | GCTCTCTGGGCAGGAACAAC      |            |
| Exon 6                            | Forward | ATTTTGAGGTAGACAACACAGGA   | 103        |
|                                   | Reverse | CTAAGATTGTGTCAGAAGTGCAA   |            |
| Exon 7                            | Forward | CAATCTGGCTTGTAAATCATGGTA  | 127        |
|                                   | Reverse | GATACAGCCAGCATTCAATCC     |            |
| Exon 8                            | Forward | CAGCATGACAGTGACAAATCTC    | 112        |
|                                   | Reverse | GGACACTTTTACACAATACAGCT   |            |
| Exon 9                            | Forward | TCATTTTGAACATATTTCCTAGTG  | 131        |
|                                   | Reverse | CACTAAATCCCCACCCTAAAGA    |            |
| Exon 10                           | Forward | CTCCTGTTACTTTTAGATGCCTG   | 96         |
|                                   | Reverse | CTGTAAATCCCCTTTGTTCACT    |            |
| Exon 11                           | Forward | GTCCTTAAAAGTGTGCTTTAGTAAC | 100        |
|                                   | Reverse | GCATCTAAAAGTAACAGGAGGTATA |            |
| Exon 12                           | Forward | GGAGATACAGGAGCACTGGCA     | 167        |
|                                   | Reverse | AGCATTACTCCAGAAACAGCTACA  |            |
| Exon 13                           | Forward | TGCTCAGTTCAGCCTGTTGGA     | 74         |
|                                   | Reverse | CAGAGGCCTGAAACGCTCCT      |            |
| Promoter<br>(Riyahi et al., 2015) | Forward | CATCTTCTCCTTTGCTACAGCC    | 470        |
|                                   | Reverse | ACAGAGCCTCAGAAGTTAGTTGA   |            |

polymorphisms (SNPs). The SNPs were named according to the position in the exonic region and/or were taken from a previous study (Riyahi et al., 2015). Construction of haplotypes followed the DNAsp programme (Librado and Rozas, 2009) and the linkage disequilibrium data were analysed with DNAsp 5.10 and its online calculator (Gaunt et al., 2007).

To test for Hardy–Weinberg equilibrium, chi-square tests were used. In order to take multiple testing into account, we calculated critical *P*-values using Holm's correction for the number of independent SNPs to test for deviations from Hardy–Weinberg equilibrium ( $P_{\text{critical}}=0.0062$ ) and associations of genotype with latency behaviour and reproductive parameters ( $P_{\text{critical}}=0.0125$ , after omitting four SNPs that deviated from Hardy–Weinberg equilibrium). Sample sizes (see Tables 1 and 2) vary between analyses because not all individuals were successfully trapped and bled, and were therefore not genotyped.

## Behavioural measurements

The response of adult birds to a novel object was tested when nestlings were 7–13 days old. A novel object (Eppendorf box) was placed on the rooftop of the nest box at the beginning of the experimental phase (see Timm et al., 2015 for details). The experimental phase was preceded by a control phase, where the normal feeding rate of birds was recorded for 15 min. We measured the feeding delay (latency in seconds to enter the nest box from the moment when the novel object was placed). The experimental phase lasted 30 min. Overall, we tested the adult (both parents) response to a novel object on 113 breeding pairs (2012 and 2014). The experiment (performed randomly in the population) was carried out between early morning (06:00 h) and early afternoon (14:00 h), during the times of highest feeding activity. The behaviour of birds

**Table 2. Alleles, protein coding and minor allele frequency (MAF) of each single nucleotide polymorphism (SNP) for the *SERT* gene in the Kilingi-Nõmme great tit population over 2 years (2012 and 2014)**

| <i>SERT</i> locus | Major/minor allele(s) | Location | MAF (%) | d.f. | $\chi^2$ | HW <i>P</i> -value | Holds: $P_{\text{critical}}=0.0062$ yes/no | Protein coding |
|-------------------|-----------------------|----------|---------|------|----------|--------------------|--------------------------------------------|----------------|
| SNP136            | a/g                   | Promoter | 20.3    | 2    | 6.594    | 0.036              | Yes                                        |                |
| SNP290            | a/g                   | Promoter | 30.5    | 2    | 18.02    | 0.000              | No                                         |                |
| SNP478            | c/t                   | Promoter | 29.5    | 2    | 22.50    | 0.000              | No                                         |                |
| SNP187            | a/t                   | Exon 1   | 29.4    | 2    | 4.425    | 0.109              | Yes                                        | Synonymous     |
| SNP253            | c/t                   | Exon 3   | 18.3    | 2    | 6.448    | 0.039              | Yes                                        | Synonymous     |
| SNP278            | a/g                   | Exon 3   | 20.7    | 2    | 15.99    | 0.000              | No                                         | Non-synonymous |
| SNP197            | c/t                   | Exon 8   | 41.0    | 2    | 0.163    | 0.921              | Yes                                        | Non-synonymous |
| SNP407            | a/t                   | Exon 8   | 36.2    | 2    | 19.18    | 0.000              | No                                         | Synonymous     |
| SNP457            | a/g                   | Exon 8   | 48.7    | 2    | 2.408    | 0.299              | Yes                                        | Non-synonymous |

Population sample size: 232 (111 individuals in 2012 and 121 individuals in 2014). HW, Hardy–Weinberg.

was recorded with a digital video camera placed on a tripod approximately 5–10 m from the nest box.

In 2014, in addition to the response to the novel object, we also recorded the delay of birds to enter the trap (116 individuals). When nestlings were at least 8 days old, a trap was placed in the inner side of the nest-box hole, allowing birds to enter, but not to leave. The latency to enter the nest box started from the moment the bird was in sight of the camera (approximately 1–2 m from the nest box; observed from the video recordings). All traps were checked after every 15 min. The trap was considered to be a more hidden novel object, as it is difficult to see from a distance, but imposing significantly stronger effect at proximity.

### Statistical analyses

Data were analysed using R statistical software version 3.1.2 (<https://www.r-project.org/>). Linear mixed-effect models (LMMs) with restricted maximum likelihood (REML), type III sum of squares and Satterthwaite approximation for degrees of freedom were conducted using ANOVA from the car package and the lmer function in the lme4 package. *F*-statistics were obtained using the lmerTest package. The R package compute.es was used to calculate effect sizes (Fisher's *z*).

Responses to a novel object and a trap during the breeding time are potentially affected by several confounding factors. First, in the analysis using data over two different years, we examined the effect of genotype, parental sex, genotype by sex interaction, sex order (two levels: the first or second parent to enter the nest box), treatment (two levels: control, novel object), habitat (deciduous versus coniferous) and brood size (as a covariate) on the latency to enter the nest box. Year, individual ID (to account for repeated measures) and brood identity (female and male parent form a breeding pair) were also included in this model as random factors. Second, in the analysis on the latency to enter the nest box in response to the nest-box trap, we examined the effect of genotype, parental sex, sex order, habitat (deciduous versus coniferous), brood size (as a covariate) and brood identity (as a random factor) and we included the interaction between genotype and sex. In none of these above models were sex order and the habitat type (two levels: deciduous or coniferous habitat) significant, and thus they were omitted from final models. Third, using data on different breeding parameters (separate models for the start of egg-laying, clutch size, number of hatched young, number of fledged young), we examined the effect of genotype, parental sex, genotype by sex interaction, habitat, brood size as fixed factors and individual ID, brood identity and year as random factors.

Pairwise *post hoc* comparisons were carried out with Tukey HSD *post hoc* multiple comparison tests (R package lsmeans; Lenth, 2016). Latency to enter the nest box was log(base) transformed before the analysis to meet normality assumptions of residuals from the models. Breeding parameters were normalised using Box–Cox

power transformation (R package MASS) (Venables and Ripley, 2002). Standardised  $\beta$  values were obtained from models with standardised variables. In order to cover allelic and genotypic effects, we used a general genetic model (that retains the three distinct genotype categories), an additive model (assuming that each additional copy of the variant allele increases the response; genotypes coded as a continuous predictor) and an over-dominant model (wherein heterozygous individuals are tested against homozygous individuals; genotype categories are coded as heterozygotes versus homozygotes). In order to take into account multiple testing, we calculated critical *P*-values using Holm's correction for the number of independent SNPs ( $P_{\text{critical}}=0.0125$ ).

### RESULTS

The *SERT* gene is polymorphic in our great tit population. Three SNPs were identified in the promoter region (SNP136, SNP290 and SNP478), one in exon 1 (SNP187), two in exon 3 (SNP253 and SNP278) and three in exon 8 (SNP197, SNP407, SNP457). The other exonic regions (exons 2, 4, 5, 6, 7, 9–13) studied were monomorphic. SNP197 in exon 8 is non-synonymous (complex data) and could affect behaviour through changes in amino acids. SNP457 in exon 8 is also non-synonymous and results in an amino acid change from proline (Pro) to leucine (Leu). SNPs found in the promoter region are the same as the SNPs detected by Riyahi et al. (2015), but the number of significant SNPs varies between the populations, as Riyahi and colleagues found more polymorphic nucleotides (11) in this gene region.

Four SNP variants in our population deviated significantly from Hardy–Weinberg equilibrium even after correcting for multiple testing (Table 2), and were removed from further analysis. All the other allele frequencies tended to stay similar over the years in all SNPs. Underrepresented genotypes were present in low frequencies in both 2012 and 2014 (Table 2). We found no complete linkage disequilibrium between SNPs (all  $R^2 < 0.2 \pm 0.2$ ). Confidence intervals (CI) for promoter regions were as follows: Kelly's  $Z_{nS}=0.24$ ; Rozas'  $Z_A=0.24$ ; Rozas'  $ZZ=0.03$ . For linkage disequilibrium between exon and promoter, the CIs were: Kelly's  $Z_{nS}=0.00$ ; Rozas'  $Z_A=0.00$ ; Rozas'  $ZZ=0.00$ .

### Response to novel objects

In the complete sample (combined data of 2012 and 2014), no effects of sex and treatment on the delay in nest visitation were detected (Table 3). There was a positive correlation between the latency in the control and novel object phase [ $\beta=0.36 \pm 0.07$  (s.e.m.),  $P < 0.001$ ,  $N=87$  nests; corrected for sex, brood size and sex order]. We also detected significant intra-individual repeatability for the latency between the control and the novel object phase (repeatability=0.67,  $F_{1,381}=5.13$ ,  $P=0.024$ ; sex:  $F_{1,381}=1.53$ ,

**Table 3. General (non-specified), additive and over-dominant genetic models for feeding delay in great tits in 2012 and 2014**

|                            | Promoter SNP136 |      | Exon1 SNP187 |      | Exon3 SNP253 |              | Exon8 SNP197 |       | Exon8 SNP457 |       |
|----------------------------|-----------------|------|--------------|------|--------------|--------------|--------------|-------|--------------|-------|
|                            | F               | P    | F            | P    | F            | P            | F            | P     | F            | P     |
| <b>General models</b>      |                 |      |              |      |              |              |              |       |              |       |
| Treatment                  | 0.01            | 0.90 | 0.15         | 0.69 | 1.17         | 0.28         | 0.39         | 0.53  | 0.09         | 0.77  |
| SNP                        | 0.49            | 0.61 | 0.05         | 0.94 | 7.48         | <b>0.007</b> | 4.41         | 0.014 | 0.01         | 0.98  |
| Sex                        | 1.43            | 0.23 | 3.46         | 0.07 | 2.47         | 0.12         | 1.08         | 0.30  | 1.86         | 0.18  |
| Brood size                 | 0.21            | 0.64 | 0.55         | 0.46 | 0.53         | 0.47         | 0.18         | 0.67  | 0.01         | 0.98  |
| Treatment×SNP              | –               | –    | –            | –    | 6.18         | 0.014        | –            | –     | 3.53         | 0.033 |
| N (pairs)                  | 89              |      | 89           |      | 88           |              | 88           |       | 81           |       |
| <b>Additive models</b>     |                 |      |              |      |              |              |              |       |              |       |
| SNP                        | –               | –    | 0.01         | 0.92 | –            | –            | 3.89         | 0.05  | 0.01         | 0.95  |
| Treatment×SNP              | –               | –    | –            | –    | –            | –            | –            | –     | 5.61         | 0.020 |
| <b>Over-dominant model</b> |                 |      |              |      |              |              |              |       |              |       |
| SNP                        | –               | –    | 0.02         | 0.87 | –            | –            | 0.44         | 0.51  | 0.04         | 0.95  |

Effects in bold remained significant after correction for multiple testing. Interactive effects with  $P>0.05$  were omitted from final models.

$P=0.22$ ). SNP253 in exon 3 was significantly associated with the delay in nest visitation (Table 3, Fig. 1). Birds with a CC genotype resumed feeding significantly earlier than those with a CT genotype. There was also a tendency for an association between SNP197 in exon 8 and the delay in nest visitation, but this relationship was not significant after correcting for multiple testing (Table 3). The explained variance in the feeding delay by SNP253 in exon 3 was 11% ( $R^2$  effect size, see Fig. 2 for effect sizes). Owing to the low frequency of the minor allele at SNP253 (exon 3), additive and over-dominant models were not fitted for this site (Table 3).

In 2014, we also measured the time it took birds ( $N=50$  nests) to enter the nest box in response to the nest box trap. The latency in the control phase was positively related to the latency in the novel object phase ( $\beta\pm s.e.=0.40\pm 0.10$ ) and trapping phase ( $\beta=0.48\pm 0.12$ ). A positive association was also found between the latency in the novel object and the trapping phase ( $\beta=0.24\pm 0.11$ ,  $N=50$  nests), while correcting for sex, brood size and sex order. The latency to enter the nest box differed significantly between all three treatment phases ( $F_{2,216.0}=19.84$ ,  $P<0.001$ ), being the longest in the trapping (mean $\pm$ s.e.m.=847 $\pm$ 59 s), intermediate in the novel object on the nest box (494 $\pm$ 53 s) and the shortest in the control (281 $\pm$ 58 s) phase

(all *post hoc* tests  $P<0.01$ ). In the trapping phase, females delayed nest visitation for a longer time than males ( $F_{2,17,53}=13.52$ ,  $P=0.002$ ) and the latency differed between SNP197 genotypes (exon 8) ( $F_{2,19,92}=6.06$ ,  $P=0.008$ ; *post hoc* tests: CC versus CT,  $P=0.029$ ; CC versus TT,  $P=0.011$ , CT versus TT,  $P=0.99$ ; Fig. 3). We also found an association between SNP253 in exon 3 and the delay in nest visitation ( $F_{2,43}=3.83$ ,  $P=0.029$ ) in response to the nest box trap, although this relationship did not remain significant after correcting for multiple testing.

### Breeding parameters

Egg-laying started significantly earlier in deciduous than in coniferous forests ( $F_{1,100.1}=18.25$ ,  $P<0.001$ ). SNP457 in exon 8 was significantly associated with the start of egg-laying in the additive model [Fisher's  $z$  (effect size)=0.36; confidence limits (CL): lower=0.14, upper=0.58; Table 4]. Females with the AG (mean $\pm$ s.e.m.=26.62 $\pm$ 0.31,  $N=61$ ; *post hoc*  $P=0.004$ ) and AA genotype (26.64 $\pm$ 0.52,  $N=21$ ; *post hoc*  $P=0.024$ ) started egg-laying earlier than those with the GG genotype (28.00 $\pm$ 0.50,  $N=23$ ), whereas no difference was observed between the AG and

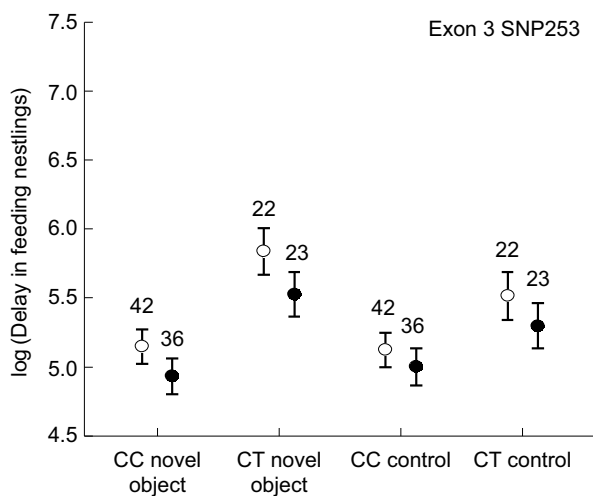

**Fig. 1. Feeding delay (over 2 years; 2012 and 2014) of female (empty circles) and male (filled circles) great tits (averaged over control and novel object phases) and the effect of the *SERT* gene (exon 3 SNP253).** Vertical bars denote s.e.m., numbers are sample sizes. Feeding delay significantly differed between different individuals with different genotypes ( $P=0.007$ ; see also Table 3).

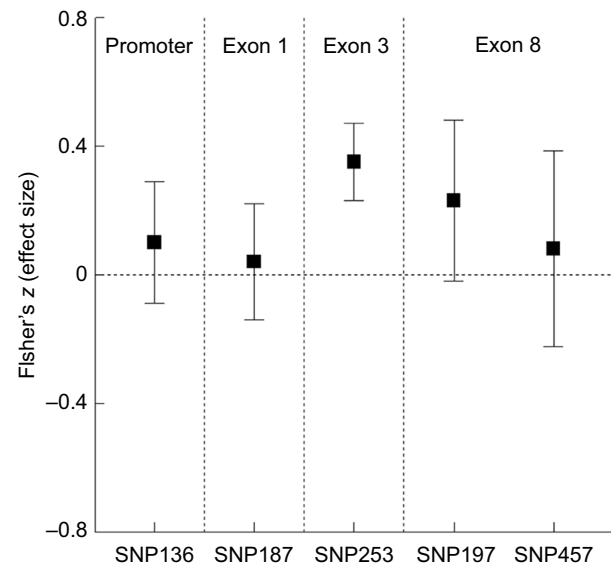

**Fig. 2. Effect sizes with 95% confidence intervals for the feeding delay in relation to *SERT* genotypes (averaged over control and novel object phases and over sexes) in 2012 and 2014 (combined data).** Effect sizes were calculated between the genotypes with the largest difference in the latent behaviour.



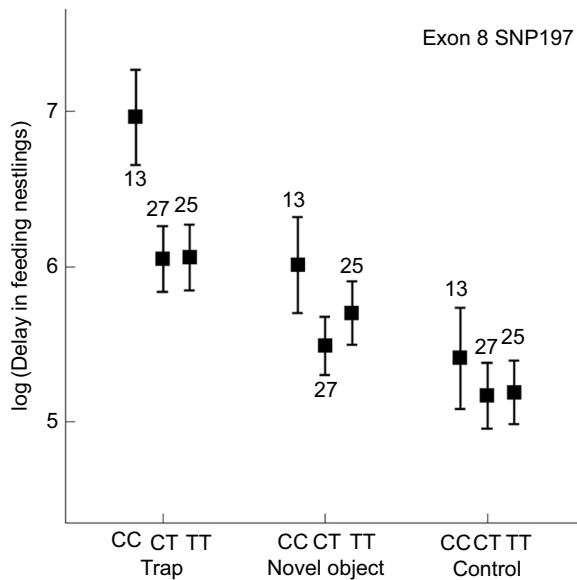

**Fig. 3.** The delay in feeding nestlings of great tits (averaged over sexes) in different treatment phases (trap, novel object and control) with respect to *SERT* SNP197 genotypes in exon 8 in 2014. Vertical bars denote s.e.m., numbers are sample sizes. There was a tendency for an association between SNP197 in exon 8 and the delay in nest visitation, but this relationship was not significant after correcting for multiple testing (Table 3).

AA genotypes ( $P=0.99$ ). Clutch size was on average larger in deciduous than in coniferous forests ( $F_{1,106,85}=8.50$ ,  $P=0.003$ ,  $N=113$  broods), but was not related to any *SERT* polymorphism (all  $P>0.21$ ; Table 4).

Brood size at hatching did not depend on habitat ( $F_{1,91,35}=3.26$ ,  $P=0.07$ ,  $N=94$  broods) and was not associated with any SNP in a general or an additive genetic model (Table 4). However, in an over-dominant model, SNP197 in exon 8 was associated with the number of hatched young. This relationship was sex specific (sex:  $F_{1,42,7}=1.09$ ,  $P=0.30$ ; sex $\times$ SNP:  $F_{1,44,16}=4.28$ ,  $P=0.044$ ) and significant in females only ( $F_{1,73,0}=7.43$ ,  $P=0.008$ ; Table 4). *Post*

*hoc* analysis among females showed that CT heterozygotes had larger broods at hatching than CC and TT homozygotes combined (mean $\pm$ s.e.m.=10.79 $\pm$ 0.56 versus 9.86 $\pm$ 0.54 offspring). Brood size on day 15 post-hatch (almost fledging) was not related to habitat ( $F_{1,95,45}=4.80$ ,  $P=0.029$ ,  $P_{critical}=0.0125$ ,  $N=98$  broods), or to any of the genetic polymorphisms (all  $P>0.08$ ; Table 4).

## DISCUSSION

In this study, we determined whether SNPs in the coding regions of the *SERT* gene could predict behavioural differences in a natural population of great tits. We found that *SERT* indeed plays an important role in individual behavioural response, and that this effect is consistent over sexes and contexts (e.g. contact with novel object, reaction to predator, etc.). Also, the *SERT* gene could be related to fitness-related traits, as one of the SNPs was significantly associated with breeding parameters. In this study, genetic variability in four polymorphic exonic regions and the promoter area in the *SERT* gene was associated with variation in the delay in feeding in response to a mild stressor (camera set-up in the control phase), a moderate stressor (novel object) and a strong stressor (nest box trap) and three fitness-related traits (start of egg-laying, clutch size and brood size). Of those five regions, SNPs in exons 3 and 8 were significantly associated with behavioural traits and SNPs in exon 8 with breeding parameters. SNP197 and SNP457 in exon 8 are non-synonymous and have the potential to affect behaviour through changes in amino acids. The polymorphism in exon 3 is synonymous, and thus does not alter the amino acid sequence; therefore, it is less likely that the relationship between the SNP253 in exon 3 and parental reproductive behaviour represents a causal relationship. However, this effect could be mediated via linkage with other non-synonymous polymorphisms, or effects on splicing or transcription (Chamary et al., 2006).

The Hardy–Weinberg equilibrium was violated in some cases, indicating that some genotypes are constantly missing or underrepresented in both years (Table 2). There is a probability that sequencing errors may be the cause of this. However, these differences tended to stay similar over both years, despite good-quality DNA and repeated sequencing. The likely cause of Hardy–

**Table 4.** General (M1), additive (M2) and over-dominant (M3) genetic models for breeding traits in great tits in 2012 and 2014

|                                                                                     | Promoter SNP136 |      | Exon1 SNP187 |      | Exon3 SNP253 |      | Exon8 SNP197 |              | Exon 8 SNP457 |              |
|-------------------------------------------------------------------------------------|-----------------|------|--------------|------|--------------|------|--------------|--------------|---------------|--------------|
|                                                                                     | F               | P    | F            | P    | F            | P    | F            | P            | F             | P            |
| Egg-laying onset (M1, M2, M3: SNP+habitat, $N=104$ broods)                          |                 |      |              |      |              |      |              |              |               |              |
| SNP (M1)                                                                            | 1.05            | 0.35 | 0.66         | 0.52 | 0.47         | 0.62 | 0.92         | 0.40         | 4.21          | 0.021        |
| SNP (M2)                                                                            | –               | –    | 0.98         | 0.33 | –            | –    | 0.02         | 0.90         | <b>8.04</b>   | <b>0.005</b> |
| SNP (M3)                                                                            | –               | –    | 1.04         | 0.31 | –            | –    | 1.63         | 0.20         | 3.28          | 0.07         |
| Clutch size (M1, M2, M3: SNP+habitat+sex+habitat+SNP $\times$ sex, $N=104$ broods)  |                 |      |              |      |              |      |              |              |               |              |
| SNP (M1)                                                                            | 0.71            | 0.49 | 1.40         | 0.26 | 1.60         | 0.21 | 0.59         | 0.56         | 0.23          | 0.80         |
| SNP (M2)                                                                            | –               | –    | 0.87         | 0.36 | –            | –    | 0.57         | 0.45         | 0.15          | 0.70         |
| SNP (M3)                                                                            | –               | –    | 2.64         | 0.12 | –            | –    | 0.70         | 0.42         | 0.37          | 0.69         |
| Brood size on day 1 (M1, M2, M3: SNP+sex+habitat+SNP $\times$ sex, $N=94$ broods)   |                 |      |              |      |              |      |              |              |               |              |
| SNP (M1)                                                                            | 2.55            | 0.08 | 0.42         | 0.66 | 1.43         | 0.49 | 1.92         | 0.16         | 0.13          | 0.87         |
| SNP (M2)                                                                            | –               | –    | 0.90         | 0.34 | –            | –    | 1.75         | 0.19         | 0.49          | 0.48         |
| SNP (M3)                                                                            | –               | –    | 1.70         | 0.20 | –            | –    | <b>8.17</b>  | <b>0.006</b> | 0.39          | 0.68         |
| Sex $\times$ SNP (M3)                                                               | –               | –    | –            | –    | –            | –    | 4.28         | 0.044        | –             | –            |
| SNP (M3) (females only)                                                             | –               | –    | –            | –    | –            | –    | <b>7.43</b>  | <b>0.008</b> | –             | –            |
| SNP (M3) (males only)                                                               | –               | –    | –            | –    | –            | –    | 0.30         | 0.64         | –             | –            |
| Brood size on day 15 (M1, M2, M3: SNP+sex+habitat+SNP $\times$ sex, $N=114$ broods) |                 |      |              |      |              |      |              |              |               |              |
| SNP (M1)                                                                            | 0.81            | 0.67 | 1.67         | 0.20 | 2.05         | 0.06 | 0.24         | 0.79         | 0.19          | 0.83         |
| SNP (M2)                                                                            | –               | –    | 2.09         | 0.15 | –            | –    | 0.42         | 0.52         | 0.14          | 0.71         |
| SNP (M3)                                                                            | –               | –    | 0.01         | 0.90 | –            | –    | 0.98         | 0.32         | 3.34          | 0.042        |

Only SNP-related effects are shown. Effects in bold remained significant after correction for multiple tests. Day 1=1 April.

Weinberg equilibrium deviations can be complex, especially in a wild, outbred population. Mate choice, mutation rates, selection, genetic drift and gene flow are not stable over time as mating is not random, there is migration in open populations and some of the individuals may be more successful in passing on their genes to the next generation than others (Hartl et al., 1997). When we compare our results with an earlier study in which the *SERT* promoter region was sequenced (Riyahi et al., 2015), we see that the number of detected polymorphisms in the promoter area differs between studies. We assume that the main differences are caused by the differences in PCR product length, where especially the ends of sequences could vary owing to the variation in sequence quality. Moreover, some SNPs found in a Spanish population (Riyahi et al., 2015) were not polymorphic in our population.

### Behavioural variation

We found that two newly discovered SNPs in exons 3 and 8 potentially play an important role in novelty-seeking and risk-taking behaviours of wild great tits. In our experiment, we manipulated nestling feeding behaviour by exposing parents to different novel stimuli. As a result, we found that the delay in feeding was the longest in the trapping phase, intermediate in the novel object phase and the shortest in the control phase. Given that feeding interruption after exposure to a stressor is a reliable measure of parental fear level (Tilgar et al., 2011; Van der Veen and Sivars, 2000), we have reason to expect parents to be differently stressed when facing a novel or threatening object. We also found that behavioural latencies measured in the presence of different stressors were moderately correlated, suggesting that this trait is repeatable over contexts. In an earlier study, a polymorphism found in the *SERT* gene promoter region was found to be associated with exploration behaviour in great tits (Riyahi et al., 2015), indicating a more general role for *SERT* in great tit personality traits.

We suggest that genotype–behaviour associations are relatively consistent over different situations. Despite varying fear levels, genotypic effects on the latency response remained the same in different experimental phases. Heterozygous individuals carrying CT genotype at the SNP253 (exon 3) tended to have significantly longer delays in feeding nestlings in all situations compared with homozygous CC genotype. In the case of SNP197 (exon 8), significant differences between genotypes emerged when the latency response during the most stressful manipulation (trapping phase) was measured. We found that homozygous individuals carrying CC genotype at the SNP197 had longer feeding delays than CT and TT genotypes.

### Breeding success and *SERT*

We hypothesized that genetic differences in *SERT* may affect breeding success via changes in behavioural decision-making. Here, we show for the first time that different *SERT* genotypes are associated with breeding time as well as offspring number at hatching.

Firstly, starting egg-laying earlier could be beneficial, especially in seasonal environments, where the selection pressure on timing of reproduction exists as the nestling phase falls within the peak of caterpillar abundance (Visser et al., 1998). Because *SERT* mainly affects behaviour-related traits, we suggest that the impact on breeding time could be linked to serotonin effects on feeding behaviour (Magalhães et al., 2010), which is important for reaching breeding condition. Alternatively, it could be mediated via serotonin effects on hormonal levels, such as prolactin. In this respect, it has been shown that prolactin is secreted by anterior pituitary cells under the stimulatory control of vasoactive intestinal polypeptide,

the activity which is controlled by neural pathways containing dopamine, serotonin and opioids (Freeman et al., 2000).

Secondly, the number of hatchlings was higher in CT heterozygotes compared with TT and CC homozygotes combined (over-dominant model). In the great tit, a female incubates eggs alone and the male feeds her during incubation (Gosler and Clement, 2007). Thus, we can assume that heterozygotes can recover more rapidly from disturbing events and resume parental activities, such as incubation and seeking food, after a shorter delay than homozygotes. Genetic polymorphisms in these loci are non-synonymous, potentially affecting *SERT* enzymatic activity and neuronal information processing in the central nervous system (Freeman et al., 2000). In order to understand these effects in the future, we have to keep in mind that the potential impact of *SERT* and the polymorphisms are linked with fitness through behavioural decisions.

The impact of genotype on reproduction could indeed occur via individual behavioural decisions (Dingemanse and Wolf, 2010). This may especially be true for reproductive traits that are related to parental sensitivity to environmental stressors through decision-making (e.g. incubation or provisioning behaviour), rather than the traits that directly depend on the parental quality and food availability (e.g. clutch size and egg size). Hence, in a heterogeneous environment, individually consistent behaviours can be adaptive in a particular environment (e.g. reduced fearfulness can be related to increased parental care in stressful environments), but maladaptive in another (for example, shy individuals can be less effective in finding novel food sources; Bell et al., 2007). Thus, it is likely that fluctuating natural selection translates genetically driven behavioural patterns into individual differences in fitness components. This could lead to the maintenance of genetic polymorphisms in natural populations.

### Acknowledgements

We kindly thank Jüri Parik for help with sequencing and analysing data, and Kaarin Koosa for help in the field. We also thank all the reviewers for reading and commenting on the manuscript.

### Competing interests

The authors declare no competing or financial interests.

### Author contributions

Conceptualization: V.T.; Methodology: K.T., K.V.O., V.T.; Formal analysis: V.T.; Investigation: K.T.; Writing - original draft: K.T., V.T.; Writing - review & editing: K.T., K.V.O., V.T.; Supervision: K.V.O., V.T.; Funding acquisition: V.T.

### Funding

This study was financed by an Institutional Research grant no. IUT34-8 from the Republic of Estonia Ministry of Education and Research (Haridus- ja Teadusministeerium).

### Data availability

DNA sequences: GenBank accession: KP869099 and SRS1185780 (Laine et al., 2016; Riyahi et al., 2015).

### References

- Adriaenssens, B. and Johnsson, J. I. (2010). Shy trout grow faster: exploring links between personality and fitness-related traits in the wild. *Beh. Ecol.* **22**, 135–143.
- Bakermans-Kranenburg, M. J. and van Ijzendoorn, M. H. (2008). Oxytocin receptor (OXTR) and serotonin transporter (5-HTT) genes associated with observed parenting. *Soc. Cogn. Affect. Neur.* **3**, 128–134.
- Bell, A. M., Backström, T., Huntingford, F. A., Pottinger, T. G. and Winberg, S. (2007). Variable behavioural and neuroendocrine responses to ecologically relevant challenges in sticklebacks. *Physiol. Behav.* **91**, 15–25.
- Canli, T. and Lesch, K.-P. (2007). Long story short: the serotonin transporter in emotion regulation and social cognition. *Nat. Neurosci.* **10**, 1103–1109.
- Carere, C. and Maestripieri, D. (2013). *Animal Personalities: Behaviour, Physiology, and Evolution*. Chicago, IL: University of Chicago Press.

- Chamary, J. V., Parmley, J. L. and Hurst, L. D. (2006). Hearing silence: non-neutral evolution at synonymous sites in mammals. *Nat. Rev. Gen.* **7**, 98-108.
- Champoux, M., Bennett, A., Shannon, C., Higley, J. D., Lesch, K. P. and Suomi, S. J. (2002). Serotonin transporter gene polymorphism, differential early rearing, and behaviour in rhesus monkey neonates. *Mol. Psych.* **7**, 1058-1063.
- Dingemans, N. J. and Wolf, M. (2010). Recent models for adaptive personality differences: a review. *Phil. Trans. Roy. Soc. B.* **365**, 3947-3958.
- Freeman, M. E., Kanyicska, B., Lerant, A. and Nagy, G. (2000). Prolactin: structure, function, and regulation of secretion. *Physiol. Rev.* **80**, 1523-1631.
- Gaunt, T. R., Rodríguez, S. and Day, I. N. M. (2007). Cubic exact solutions for the estimation of pairwise haplotype frequencies: implications for linkage disequilibrium analyses and a web tool 'CubeX'. *BMC Bioinformatics.* **8**, 428.
- Gosler, A. and Clement, P. (2007). Family Paridae (tits and chickadees). In *Handbook of the Birds of the World - Volume 12: Picathartes to Tits and Chickadees* (ed. J. del Hoyo, A. Elliott, D. A. Christie), pp. 662-709. Barcelona: Lynx Edicions.
- Gryglewski, G., Lanzenberger, R., Kranz, G. S. and Cumming, P. (2014). Meta-analysis of molecular imaging of serotonin transporters in major depression. *J. Cerebr. Blood F. Metabol.* **34**, 1096-1103.
- Hartl, D. L., Clark, A. G. and Clark, A. G. (1997). *Principles of Population Genetics*, Vol. 116. Sunderland: Sinauer Associates.
- Holtmann, B., Grosser, S., Lagisz, M., Johnson, S. L., Santos, E. S. A., Lara, C. E., Robertson, B. C. and Nakagawa, S. (2016). Population differentiation and behavioural association of the two 'personality' genes *DRD4* and *SERT* in dunnocks (*Prunella modularis*). *Mol. Ecol.* **25**, 706-722.
- Korsten, P., Mueller, J. C., Hermannstädter, C., Bouwman, K. M., Dingemans, N. J., Drent, P. J., Liedvogel, M., Matthysen, E., van Oers, K., van Overveld, T. et al. (2010). Association between *DRD4* gene polymorphism and personality variation in great tits: a test across four wild populations. *Mol. Ecol.* **19**, 832-843.
- Laine, V. N. and van Oers, K. (2017). The quantitative and molecular genetics of individual differences in animal personality. In *Personality in Nonhuman Animals* (ed. J. Vonk, A. Weiss and S. A. Kuczaj), pp. 55-72. Cham: Springer.
- Laine, V. N., Gossmann, T. I., Schachtschneider, K. M., Garroway, C. J., Madsen, O., Verhoeven, K. J. F., de Jager, V., Megens, H.-J., Warren, W. C., Minx, P. et al. (2016). Evolutionary signals of selection on cognition from the great tit genome and methylome. *Nat. Comm.* **7**, 10474.
- Lenth, R. V. (2016). Least-squares means: the R package lsmeans. *J. Stat. Soft.* **69**, doi:10.18637/jss.v069.i01.
- Lerch-Haner, J. K., Frierson, D., Crawford, L. T. K., Beck, S. G. and Deneris, E. S. (2008). Serotonergic transcriptional programming determines maternal behavior and offspring survival. *Nat. Neurosci.* **11**, 1001-1003.
- Lesch, K.-P., Bengel, D., Heils, A., Greenberg, B. D., Petri, S., Benjamin, J., Muller, C. R., Hamer, D. H., Murphy, D. L. and Sabol, S. Z. (1996). Association of anxiety-related traits with a polymorphism in the serotonin transporter gene regulatory region. *Science* **274**, 1527.
- Librado, P. and Rozas, J. (2009). DnaSP v5: a software for comprehensive analysis of DNA polymorphism data. *Bioinformatics* **25**, 1451-1452.
- Magalhães, C. P., de Freitas, M. F. L., Nogueira, M. I., Campina, R. C. F., Takase, L. F., de Souza, S. L. and de Castro, R. M. (2010). Modulatory role of serotonin on feeding behaviour. *Nutr. Neurosci.* **13**, 246-255.
- Müller, J. C., Partecke, J., Hatchwell, B. J., Gaston, K. J. and Evans, K. L. (2013). Candidate gene polymorphisms for behavioural adaptations during urbanization in blackbirds. *Mol. Ecol.* **22**, 3629-3637.
- Murphy, D. L., Fox, M. A., Timpano, K. R., Moya, P. R., Ren-Patterson, R., Andrews, A. M., Holmes, A., Lesch, K.-P. and Wendland, J. R. (2008). How the serotonin story is being rewritten by new gene-based discoveries principally related to SLC6A4, the serotonin transporter gene, which functions to influence all cellular serotonin systems. *Neuropharmacology* **55**, 932-960.
- O'Leary, O. F. and Cryan, J. F. (2010). The behavioural genetics of serotonin: relevance to anxiety and depression. *Handbook Behav. Neurosci.* **21**, 749-789.
- Pagani-Núñez, E. and Senar, J. C. (2013). One hour of sampling is enough: great tit *Parus major* parents feed their nestlings consistently across time. *Acta Ornithol.* **48**, 194-200.
- Riyahi, S., Sánchez-Delgado, M., Calafell, F., Monk, D. and Senar, J. C. (2015). Combined epigenetic and intraspecific variation of the *DRD4* and *SERT* genes influence novelty seeking behaviour in great tit *Parus major*. *Epigenetics* **10**, 516-525.
- Savitz, J. B. and Ramesar, R. S. (2004). Genetic variants implicated in personality: a review of the more promising candidates. *Am. J. Med. Genet. B.* **131B**, 20-32.
- Serretti, A., Calati, R., Mandelli, L. and De Ronchi, D. (2006). Serotonin transporter gene variants and behaviour: a comprehensive review. *Curr. Drug Targets* **7**, 1659-1669.
- Smith, B. R. and Blumstein, D. T. (2008). Fitness consequences of personality: a meta-analysis. *Behav. Ecol.* **19**, 448-455.
- Tilgar, V., Moks, K. and Saag, P. (2011). Predator-induced stress changes parental feeding behavior in pied flycatchers. *Beh. Ecol.* **22**, 23-28.
- Timm, K., Tilgar, V. and Saag, P. (2015). *DRD4* gene polymorphism in great tits: gender-specific association with behavioural variation in the wild. *Beh. Ecol. Sociobiol.* **69**, 729-735.
- Van der Veen, I. T. and Sivars, L. E. (2000). Causes and consequences of mass loss upon predator encounter: feeding interruption, stress or fit-for-flight? *Func. Ecol.* **14**, 638-644.
- van Oers, K., De Jong, G., Van Noordwijk, A. J., Kempenaers, B. and Drent, P. J. (2005). Contribution of genetics to the study of animal personalities: a review of case studies. *Behaviour* **142**, 1185-1206.
- Venables, W. N. and Ripley, B. D. (2002). *Modern Applied Statistics with S, 4th edn.* New York: Springer.
- Visser, M. E., Van Noordwijk, A. J., Tinbergen, J. M. and Lessells, C. M. (1998). Warmer springs lead to mistimed reproduction in great tits (*Parus major*). *Proc. Roy. Soc. B.* **265**, 1867-1870.
- Vrublevska, J., Krama, T., Rantala, M. J., Mierauskas, P., Freeberg, T. M. and Krams, I. A. (2015). Personality and density affect nest defence and nest survival in the great tit. *Acta Ethol.* **18**, 111-120.
